# Supplementary material for: Prediction of IDH Status Through MRI Features and Enlightened Reflection on the Delineation of Target Volume in Low-Grade Gliomas
Source: PubMed Central journal article supplement — Technol Cancer Res Treat. 2019 Sep 29;18:1533033819877167. doi: 10.1177/1533033819877167 (PMC6767744; doi:10.1177/1533033819877167), 2019-09-29
Supplement: Supple_Table.pdf [file Supple_Table.pdf]

**Variables in the Equation**

|                     |             | B      | S.E. | Wald  | df | Sig. | Exp(B) |
|---------------------|-------------|--------|------|-------|----|------|--------|
| Step 1 <sup>a</sup> | Enhance(1)  | 2.590  | .871 | 8.848 | 1  | .003 | 13.333 |
|                     | Constant    | -.981  | .677 | 2.099 | 1  | .147 | .375   |
| Step 2 <sup>b</sup> | Enhance(1)  | 2.555  | .964 | 7.022 | 1  | .008 | 12.865 |
|                     | Cortical(1) | -1.882 | .952 | 3.910 | 1  | .048 | .152   |
|                     | Constant    | .041   | .856 | .002  | 1  | .962 | 1.042  |

Supple. Table. Binary Logistic regression analyze of cMRI features.
